# Supplementary material for: HAE patient self-sampling for biomarker establishment
Source: Orphanet J Rare Dis. 2021 Sep 28;16:399. doi: 10.1186/s13023-021-02021-x (PMC8478266; doi:10.1186/s13023-021-02021-x)
Supplement: Supplementary file 1 — Additional file 1. The file contains a list of all sites that contributed to enrollment of participants. [file 13023_2021_2021_MOESM1_ESM.pdf]

## **Initiated and contributing HAEKA centers**

Department of Dermatology and Allergy  
Charité - Universitätsmedizin Berlin  
Berlin  
Germany

Medizinische Hochschule Hannover  
Klinik für Dermatologie, Allergologie und Venerologie  
Hannover  
Germany

Klinik für Dermatologie, Venerologie und Allergologie  
Universitätsmedizin Leipzig  
Leipzig  
Germany

HNO-Klinik, Kopf- und Halschirurgie  
Universitätsklinikum Ulm  
Ulm  
Germany

Universitätsklinikum Frankfurt  
Klinik für Kinder- und Jugendmedizin  
Frankfurt  
Germany

HZRM Hämostase Zentrum Rhein Main GmbH  
Mörfelden-Walldorf  
Germany

Department of Dermatology and Allergy  
Hautklinik und Poliklinik der Universitätsmedizin  
Johannes Gutenberg-Universität Köln  
Mainz  
Germany
